# Supplementary material for: Identification of causative agents of infective endocarditis by metagenomic next-generation sequencing of resected valves
Source: Front Cell Infect Microbiol. 2025 Mar 13;15:1532257. doi: 10.3389/fcimb.2025.1532257 (PMC11966046; doi:10.3389/fcimb.2025.1532257)
Supplement: Supplementary file 3 [file Table1.xlsx]

## Sheet: S1
	Supplementary Table 1. Overview of sample processing details, qPCR results, and mNGS read and contig counts
´	Valve	Sample No.		2	3	4	5	6	7	8	9	10	11	12	13	14	15	16A	16B	17	18	19	20
		Conservation of the specimen before DNA extraction [°C]		–80	–80	–80	–80	–80	+4	–80	–80	+4	–80	–80	+4	+4	–80	+4	+4	–80	–80	+4	+4
		Input valve specimen mass for homogenisation [mg]		34; 39 (a)	270	92	180	320	70	226	306	45	94; 100 (a)	106+200; 109+200(af)	49+200; 46+200 (af)	93; 93 (a)	280	45; 51 (a)	133; 142 (a)	330+300 (f)	Not weighed	Not weighed	Not weighed
		DPBS volume added prior to homogenisation [µL]		–	200	200	200	160	70	200	300	100	100; 100 (a)	–	–	100; 100 (a)	–	100; 100 (a)	100; 100 (a)	–	–	–	–
		DPBS volume used for beads rinsing [µL]		60; 60 (a)	–	100	–	–	200	200	–	300	–	–	50; 50 (a)	–	300	100; 100 (a)	100; 100 (a)	–	160	200	200
		MOLZ	Sequencing data ID	GTH-759	AEOM-6	AEOM-14	AEOM-18	AEOM-10	AEOM-22	AEOM-26	AEOM-42	AEOM-46	AEOM-54	AEOM-56	AEOM-64	AEOM-66	AEOM-74	AEOM-77	AEOM-79	AEOM-85	AEOM-87	AEOM-262	AEOM-264
			Input homogenate mass for DNA extraction [mg]	(e)	210	100	153	170	130	150	245	240	(e)	(e)	(e)	(e)	230	(e)	(e)	232	151	263	300
			qPCR bacteria [pg/uL]	2.75	0.07	20.82	1.5	1270.2	9.88	1152.57	9.23	0.591604	46.9765	51.2419	0.259471	460.749	1.42799	0.232944	0.172783	18.2125	0.106136	6.26437	695.772
			qPCR human [pg/uL]	55.75	115.14	27.71	7.02	4.47	3435.1	129.55	803.53	515.671	386.428	10126.7	848.269	3387.2	591.415	8607.32	171.441	1237.22	275.792	343.085	130.907
			qPCR total [pg/uL]	58.5	115.21	48.53	8.52	1274.67	3444.98	1282.12	812.76	516.263	433.405	10178	848.529	3847.95	592.843	8607.55	171.614	1255.43	275.898	349.349	826.679
			% bacterial DNA (g) (qPCR)	4.70085	0.0607586	42.9013	17.6056	99.6493	0.286794	89.8956	1.13564	0.114594	10.839	0.503458	0.0305789	11.9739	0.240872	0.00270627	0.100682	1.45069	0.0384693	1.79315	84.1647
			Reads Total (mNGS)	8839109	1509571	4183890	3965406	2502493	4301165	4392248	5084123	5761187	3632353	5212539	1307195	1367717	881551	1724260	1075477	1026191	2983056	2848777	2188304
			Reads QF (mNGS)	4490039	869591	1675203	1907276	2089470	2413319	2966686	2880388	2781523	1851451	2939492	787930	768987	560049	1049556	634488	425992	1064536	1629123	1469199
			Reads Human (mNGS)	4395250	868971	1429883	1646163	8302	2404591	499179	2861251	2778484	1811460	2930626	787728	699868	559657	1049055	634132	422675	1063444	1576250	273546
			Reads Non-human (mNGS)	94789	620	245320	261113	2081168	8728	2467507	19137	3039	39991	8866	202	69119	392	501	356	3317	1092	52873	1195653
			Reads Bacterial (mNGS)	85189	409	243402	189745	2050970	7296	2466205	18005	1212	39395	7229	29	65600	187	60	63	1801	146	52186	1190431
			% bacterial reads (g) (mNGS)	1.90135	0.047045	14.5464	10.3352	99.5968	0.302502	83.1665	0.625335	0.0436019	2.12848	0.246064	0.00368134	8.56992	0.0334022	0.00571911	0.00993385	0.424288	0.0137271	3.20467	81.3149
			Number of contigs	6595	86	1520	1212	1977	1291	338	1437	135	1603	1232	22	637	29	19	15	118	1	545	120
			Sum of contigs' lengths [nt]	4090833	34975	2472558	2449992	7839443	785622	2247534	1694027	55482	1817380	928976	9447	1922325	11804	7608	6012	52064	375	1893536	2179030
			N50	633	408	2443	13567	9535	620	38653	1829	403	1445	842	429	7624	393	393	408	414	375	7011	47869
		MOLZ-CH	Sequencing data ID	GTH-760	AEOM-7	AEOM-15	AEOM-19	AEOM-11	AEOM-23	AEOM-27	AEOM-43	AEOM-47	AEOM-55	AEOM-57	AEOM-65	AEOM-67	AEOM-75	AEOM-78	AEOM-80	AEOM-86	AEOM-88	AEOM-263	AEOM-265
			Input homogenate mass for DNA extraction [mg]	(e)	210	100	153	170	130	150	245	120	(e)	(e)	(e)	(e)	230	(e)	(e)	249	150	265	300
			Volume of 2% collagenase I, collagenase II and hyaluronidase [µL] (each)	10 (b)	21	10	16	17	13	15	25	12	20	30	20	20	23	25	35	25	15	27	30
			Collagenase I, collagenase II and hyaluronidase conservation (c)	–20 °C	Fresh	Fresh	Fresh	–20 °C	–20 °C	–20 °C	–20 °C	Fresh	Fresh	Fresh	Fresh	Fresh	Fresh	Fresh	Fresh	Fresh	Fresh	–20 °C	Fresh
			Short spin/centrifugation (2000g, 5 min) (d)	–/–	+/+	+/+	+/+	–/+	–/+	–/+	+/–	+/–	+/–	+/–	+/–	+/–	+/–	+/–	+/–	+/–	+/–	+/–	+/–
			qPCR bacteria [pg/uL]	2.66	6.89	6.59	3.02	173.38	3.08	89.2	17.86	1.99603	94.8694	179.709	0.62387	249.417	1.37017	0.43387	0.538522	17.5849	0.189669	13.3098	3134.42
			qPCR human [pg/uL]	14.31	230.38	31.36	7.05	2.3	13.17	116.57	156.17	9.76301	363.185	118.529	240.1	1199.07	141.091	80.0994	32.3012	757.022	21.7516	1543.09	94.47
			qPCR total [pg/uL]	16.97	237.27	37.95	10.07	175.68	16.25	205.77	174.03	11.759	458.055	298.238	240.724	1448.48	142.461	80.5333	32.8397	774.607	21.9412	1556.4	3228.89
			% bacterial DNA (g) (qPCR)	15.6747	2.90386	17.365	29.9901	98.6908	18.9538	43.3494	10.2626	16.9744	20.7114	60.257	0.259164	17.2192	0.961784	0.538746	1.63985	2.27017	0.86444	0.855166	97.0742
			Reads Total (mNGS)	3155629	3367087	8841622	2001195	2896826	1006697	6892804	7058362	950629	4205414	1498039	2653627	1508465	337701	1794213	1323281	1553572	3980590	7716084	2280100
			Reads QF (mNGS)	1550199	1963512	3394378	939860	2398173	401073	3320121	3436999	311904	2324481	920446	1572582	791201	195976	945634	574862	589185	1145626	3976886	1569060
			Reads Human (mNGS)	1490575	1960650	3285251	791410	64345	380471	2841562	3156756	294875	2130715	253946	1571186	673666	195620	944074	573779	579140	1138295	3834195	71456
f			Reads Non-human (mNGS)	59624	2862	109127	148450	2333828	20602	478559	280243	17029	193766	666500	1396	117535	356	1560	1083	10045	7331	142691	1497604
			Reads Bacterial (mNGS)	57877	1962	105575	115083	2308665	16208	474883	278345	12001	192879	658016	345	110803	178	657	586	5328	4994	139821	1490860
			% bacterial reads (g) (mNGS)	3.73773	0.0999688	3.11355	12.6954	97.2885	4.08592	14.319	8.10296	3.9107	8.30089	72.1539	0.0219531	14.1246	0.09091	0.0695436	0.102026	0.911598	0.43681	3.51838	95.4263
			Number of contigs	2648	340	2020	1833	2844	3489	211	522	2549	1404	244	119	563	23	101	60	699	28	469	111
			Sum of contigs' lengths [nt]	2015209	147382	2157197	2856038	8281724	1740562	2192440	2094447	1106547	2408263	2207705	54388	2047542	9857	39915	23608	360424	10867	2033179	2183669
			N50 statistic	879	415	1410	17688	7329	468	29459	18732	422	2691	24316	430	13731	413	393	392	512	384	15686	53156
	NECs	NEC No.		2	3	4	5	6	7	8	9 (h)	10 (h)	11-12 (h)		13-14 (h)		15-16 (h)			17-18 (h)		19-20 (h)
		MOLZ	Sequencing data ID	GTH-761	AEOM-8	AEOM-16	AEOM-20	AEOM-12	AEOM-24	AEOM-28	AEOM-44	AEOM-48	AEOM-58		AEOM-69		AEOM-81			AEOM-89		AEOM-266
			qPCR bacteria [pg/uL]	0.05	0.16117	0.0381271	0.0432238	0.247048	0.387422	0.251011	0.1	0.17	0.1		0.2		0.12			0.2		0.04
			qPCR human [pg/uL]	0	0	0	0	0	5.34133e-06	5.34133e-06	0	0	0		0		0			0		0
			Reads Total (mNGS)	4574020	93323	118804	288830	190479	54512	891573	667990	21583	25036		5938		4592			12404		53131
			Reads QF (mNGS)	273886	32788	37148	118924	69667	18888	233918	206299	7285	9526		2587		1955			4425		12467
			Reads Human (mNGS)	138115	2054	18626	84280	4206	6460	212482	143683	1389	1532		381		170			782		907
			Reads Non-human (mNGS)	135771	30734	18522	34644	65461	12428	21436	62616	5896	7994		2206		1785			3643		11560
			Reads Bacterial (mNGS)	107471	11303	14104	26930	49410	6549	18991	48950	2993	3253		1043		1467			1553		2482
			% bacterial reads (g) (mNGS)	43.761	84.6223	43.092	24.2154	92.1553	50.3421	8.20441	25.411	68.3021	67.9833		73.2444		89.6151			66.5096		73.2369
		MOLZ-CH	Sequencing data ID	GTH-762	AEOM-9	AEOM-17	AEOM-21	AEOM-13	AEOM-25	AEOM-29	AEOM-45	AEOM-49	AEOM-59		AEOM-70		AEOM-82			AEOM-90		AEOM-267
			qPCR bacteria [pg/uL]	0.93	1.46579	0.355185	2.60216	2.24682	3.16328	2.67385	0.43	1.02	0.57		0.23		0.28			0.23		0.13
			qPCR human [pg/uL]	0	0	0	0	0	5.34133e-06	5.34133e-06	0	0	0		0		0			0		0
			Reads Total (mNGS)	5824643	117747	1446742	781006	458704	50353	68134	18629	78619	12953		8720		29357			20142		76065
			Reads QF (mNGS)	777993	48282	493526	180261	187002	23746	29283	6310	26422	6017		4565		9215			8249		24206
			Reads Human (mNGS)	296077	6646	92643	46489	2626	2635	8593	1116	3969	624		420		625			2485		8564
			Reads Non-human (mNGS)	481916	41636	400883	133772	184376	21111	20690	5194	22453	5393		4145		8590			5764		15642
			Reads Bacterial (mNGS)	403181	35045	306744	116408	179451	15269	18581	4131	17959	4078		3298		6480			3734		10023
			% bacterial reads (g) (mNGS)	57.6584	84.0589	76.8037	71.4611	98.5578	85.2826	68.3779	78.7307	81.8999	86.7291		88.7036		91.2034			60.0418		53.9248
	Sequencing run			1	2	3	3	2	4	4	5	5	6	6	7	7	8	8	8	9	9	10	10
	Amplification cycles for Illumina library			16	16	18	18	16	16	16	16	16	16	16	16	16	16	16	16	16	16	16	16
	Ultra-Deep Microbiome Prep (Molzym) kit lot No			P22qKG020	I19qKG020	I19qKG020	I19qKG020	I19qKG020	I19qKG020	I19qKG020	I19qKG020	L04pKG020	L04pKG020	L04pKG020	L04pKG020	L04pKG020	M17oKG020	M17oKG020	M17oKG020	M17oKG020	M17oKG020	M17oKG020	M17oKG020
	a	Separate homogenisation of two fragments of the same valve
	b	Digestion performed for 1 h (insted of 1.5 h)
	c	Fresh = freshly prepared solutions used; –20° C = solutions stored at –20° C ( < 1 month) before use
	d	Follows the MolDNase B incubation step in order to remove undigested tissue
	e	Sample not weighed
	f	Solid + liquid specimen
	g	Relative to the sum of bacterial and human fractions
	h	NECs temporally separated from DNA extractions from valve specimens
